# Supplementary material for: Fe3O4/carbon composites obtained by electrospinning as an anode material with high rate capability for lithium ion batteries
Source: Royal Society of Chemistry journal article supplement (doi:10.1039/c4ra06888b), 2014-07-30
Supplement: c4ra06888b1.pdf [file c4ra06888b1.pdf]

Electronic Supplementary Information

## $\text{Fe}_3\text{O}_4/\text{Carbon}$ composites obtained by electrospinning as an anode material with high rate capability for lithium ion batteries

Shaozhen Gu, Yuping Liu, Guanhua Zhang, Wei Shi, Yutang Liu\*, Jian Zhu\*

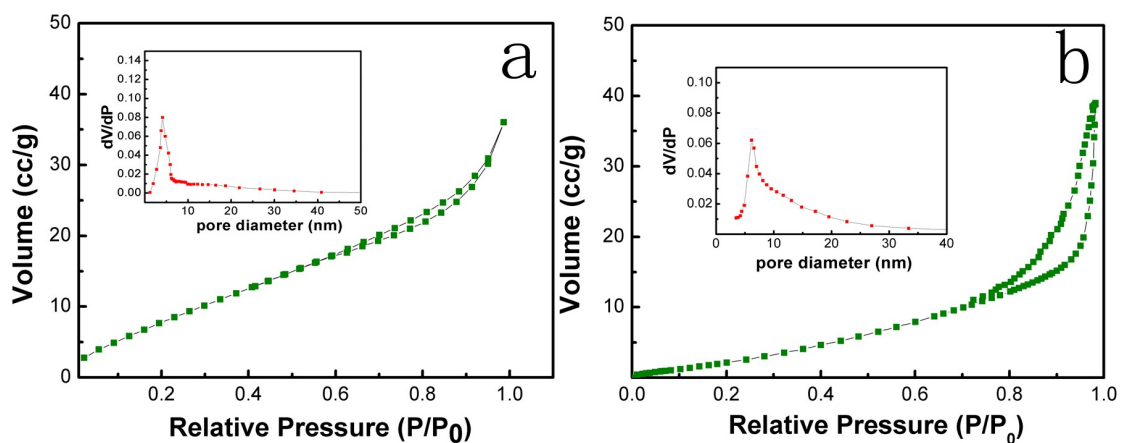

**Figure. S1** Nitrogen adsorption and desorption isotherms and the corresponding BJH distributions (inset) of (a) the pure  $\text{Fe}_2\text{O}_3$  with the average pore diameter of 6.1 nm and (b)  $\text{Fe}_3\text{O}_4/\text{C}$  composites with the average pore diameter of 4.3 nm.

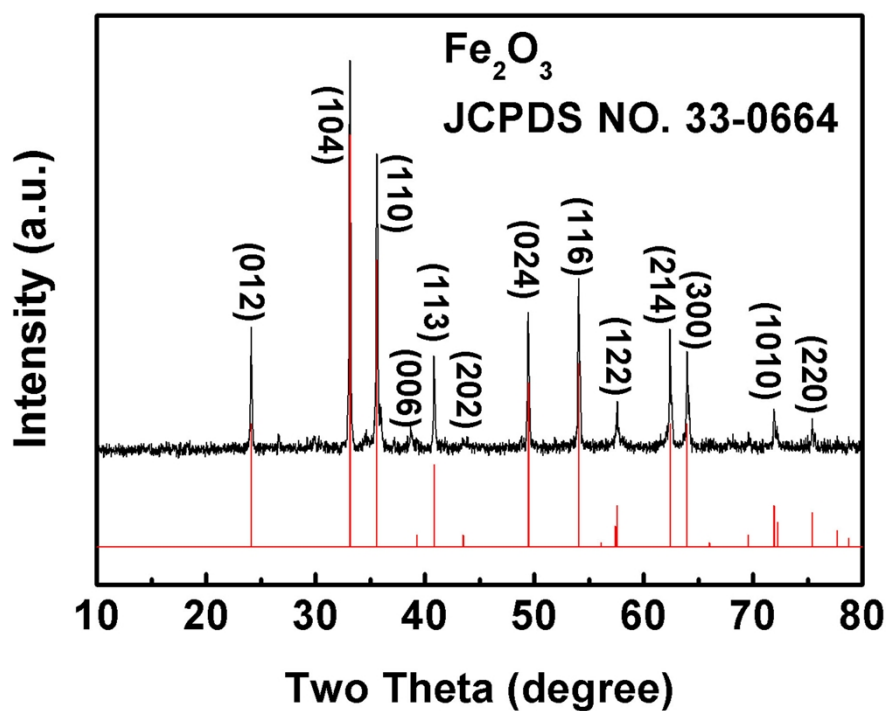

Figure. S2 XRD pattern of the sample after the TGA test at 1000 °C with the heating rate of 3.5 °C min<sup>-1</sup>.

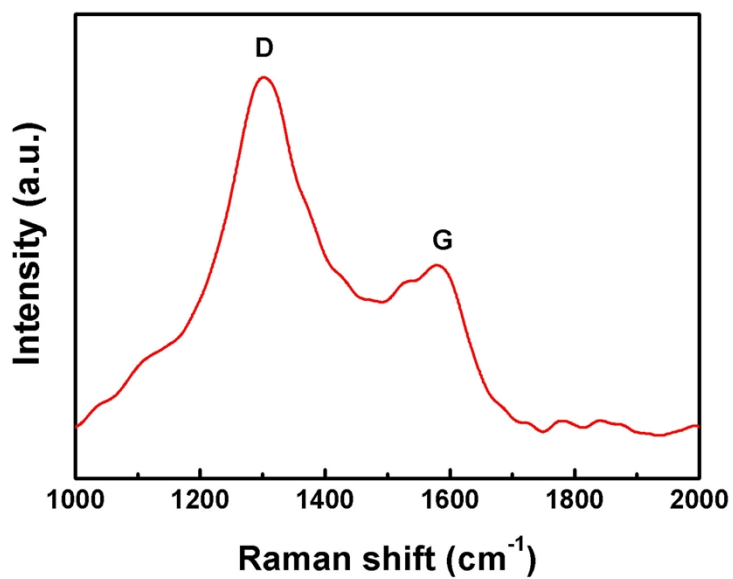

Figure. S3 Raman spectrum of the  $\text{Fe}_3\text{O}_4/\text{C}$  composites.

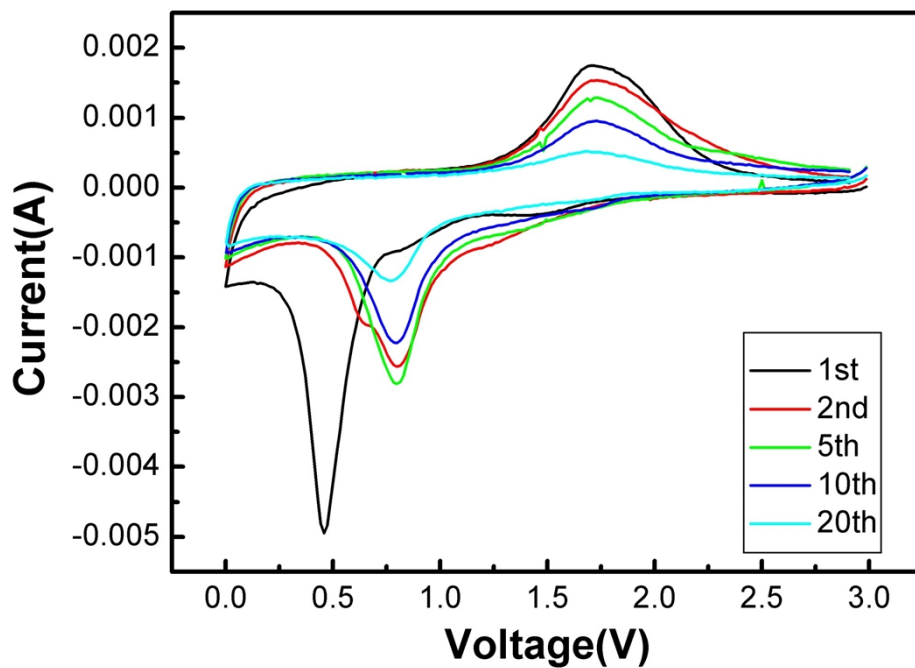

**Figure. S4** Cyclic Voltammetry (CV) of the pure  $\text{Fe}_2\text{O}_3$  at a scan rate of  $0.5 \text{ mV s}^{-1}$  over a voltage range of 0.01–3.00 V versus  $\text{Li/Li}^+$ .

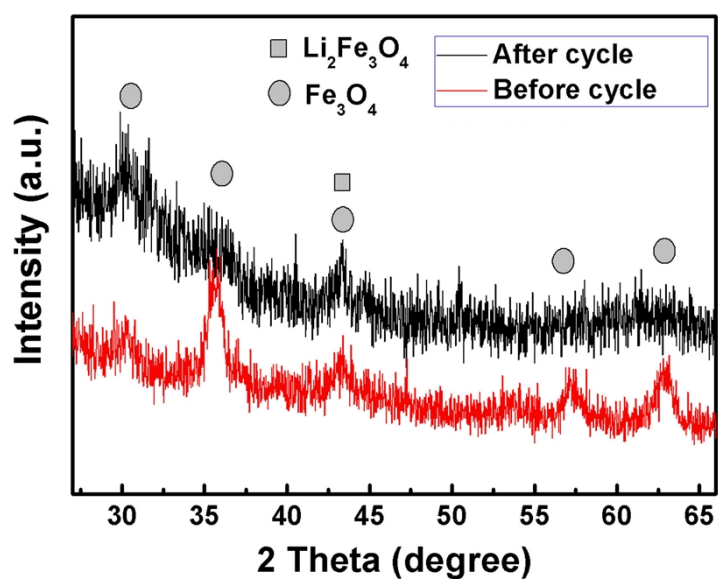

**Figure. S5** The XRD pattern of  $\text{Fe}_3\text{O}_4/\text{C}$  electrode before cycle and after discharging to 0.8V. Rotundity and quadrate are the symbols of  $\text{Fe}_3\text{O}_4$  and  $\text{Li}_2\text{Fe}_3\text{O}_4$  phase, respectively.

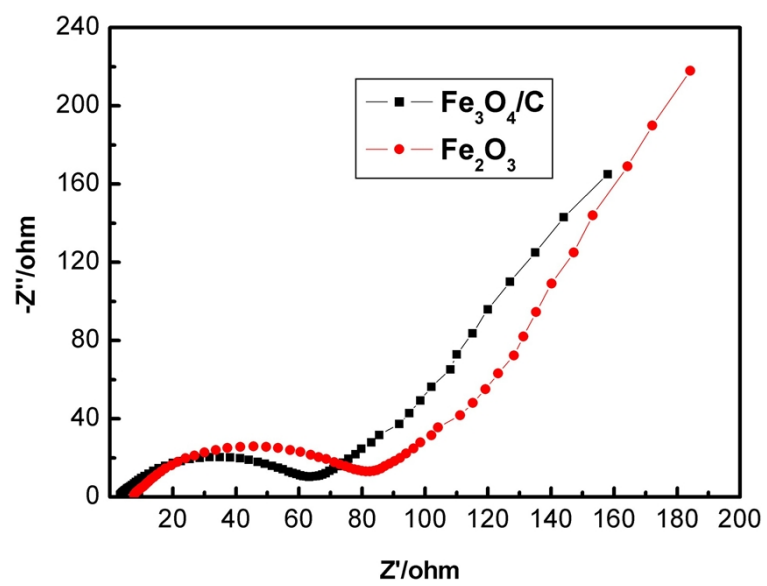

**Figure. S6** Electrochemical impedance spectroscopy (EIS) of the pure Fe<sub>2</sub>O<sub>3</sub> and Fe<sub>3</sub>O<sub>4</sub>/C composite.
